# Supplementary material
Source: PubMed Central journal article supplement (PMC3690970)
Supplement: supp_ddt141_ddt141supp.pdf [file supp_ddt141_ddt141supp.pdf]

## **Supplemental Data**

### **A Sequence Variant Associated with Sortilin-1 (*SORT1*) on 1p13.3 is Independently Associated with Abdominal Aortic Aneurysm**

Gregory T. Jones, Matthew J. Bown, Solveig Gretarsdottir, Simon P. R. Romaine, Anna Helgadottir, Grace Yu, Gerard Tromp, Paul E. Norman, Cao Jin, Annette F. Baas, Jan D. Blankensteijn, Iftikhar J. Kullo, L. Victoria Phillips, Michael J. A. Williams, Ruth Topless, Tony R. Merriman, Thodor M. Vasudevan, David R. Lewis, Ross D. Blair, Andrew A. Hill, Robert D. Sayers, Janet T. Powell, Panagiotis Deloukas, Gudmar Thorleifsson, Stefan E. Matthiasson, Unnur Thorsteinsdottir, Jonathan Golledge, Robert A. Ariëns, Anne Johnson, Soroush Sohrabi, D. Julian Scott, David J. Carey, Robert Erdman, James R. Elmore, Helena Kuivaniemi, Nilesh J. Samani, Kari Stefansson, Andre M. van Rij

#### **Full list of Investigators**

##### The Vascular Research Consortium of New Zealand

Gregory T. Jones, Grace Yu, L. Victoria Phillip, Cao Jin, Andre M. van Rij, Geraldine B. Hill, Michael J. A. Williams, Gerard T. Wilkins, Ruth Topless, Les McNoe, Tony R. Merriman, Thodor M. Vasudevan, David R. Lewis, Ross D. Blair, Andrew A. Hill, Ian A Thomson, Jo Krysa.

##### The WTCCC Consortium

Matthew J. Bown, Robert D. Sayers, Janet T. Powell, Panagiotis Deloukas and Nilesh J. Samani for the WTCCC consortium.

##### The deCODE Genetics AAA consortium

Solveig Gretarsdottir, Gudmar Thorleifsson, Stefan E. Matthiasson, Anna Helgadottir, Unnur Thorsteinsdottir and Kari Stefansson.

##### The Netherlands AAA Group

Annette F. Baas and Jan D, Blankensteijn

##### The Health in Men Study, Australia

Paul E. Norman and Jonathan Golledge

##### The Leeds AAA Study

Simon Romaine, Robert A. Ariëns, Anne Johnson, Soroush Sohrabi, and D. Julian Scott.

##### Geisinger Clinic AAA Investigators

Gerard Tromp, David J. Carey, Robert Erdman, Alicia Golden, Kimberly Derr, William D. Bowen, John L. Gray, Robert P. Garvin, David P. Franklin, James R. Elmore, and Helena Kuivaniemi.

##### The Mayo Clinic eMERGE study

Iftikhar J. Kullo

## **Study Cohort Descriptions**

**NZ AAA Genetics Study:** The Vascular Research Consortium of New Zealand ([www.vrcnz.org](http://www.vrcnz.org)), recruited New Zealand men and women with a proven history of AAA (infra-renal aortic diameter  $\geq 3$ cm proven on ultrasound or CT scan). Approximately 80% had undergone surgical AAA repair (typically AAA's  $> 50$  mm in diameter). The vast majority of cases ( $>97\%$ ) were of Anglo-European ancestry as reported previously (1, 2). The control group underwent an abdominal ultrasound scan to exclude ( $>25$ mm) concurrent abdominal aortic aneurysm and Anglo-European ancestry was required for inclusion. Controls were also screened for peripheral artery disease (ankle brachial index), carotid artery disease (ultrasound) and other cardiovascular risk factors (Supplementary Table S1).

**WTCCC Aneurysm Consortium:** The Aneurysm Consortium recruited cases of AAA from centres across the United Kingdom, New Zealand and Western Australia. Only the UK cases were used in this study to prevent overlap with the NZ and Australian case groups. Cases were defined as an infra-renal aortic diameter  $\geq 3$ cm proven on ultrasound or CT scan. Controls were taken from the WTCCC2 common control group (1, 3) and were therefore unscreened for AAA.

**Iceland:** Icelandic individuals with AAA (defined as infra-renal aortic diameter  $\geq 30$  mm) were recruited from a registry of individuals who were admitted at Landspítali University Hospital, in Reykjavik, Iceland, 1980 – 2006. AAA patients were either followed up or treated by intervention for emergency repair of symptomatic or ruptured AAA or for an elective repair by surgery or endovascular intervention. Subjects with AAA were enrolled as part of the CVD genetics program at deCODE. The Icelandic controls used were selected from among individuals who have participated in various GWA studies and who were recruited as part of genetic programs at deCODE. Individuals with known cardiovascular disease were excluded as controls (2) but controls were unscreened for AAA.

**The Netherlands:** The AAA sample set from Utrecht was recruited in 2007-2009 from eight centres in The Netherlands (2), mainly when individuals visited their vascular surgeon in the polyclinic or, in rare cases, during hospital admission for elective or emergency AAA surgery. An AAA was defined as an infrarenal aorta  $\geq 30$  mm. The sample set comprised 89.9% males, with a mean AAA diameter of 58.4 mm, 61.7% had received surgery, of which 8.1 % was after rupture. The Dutch controls used in the AAA GWAS were recruited as part of the Nijmegen Biomedical Study and the Nijmegen Bladder Cancer Study ([seehttp://dceg.cancer.gov/icbc/membership.html](http://dceg.cancer.gov/icbc/membership.html)).

**Western Australia, The Health in Men Study (HIMS):** is a population-based randomized trial of screening for abdominal aortic aneurysms (AAAs) conducted in Perth, Western Australia in 1996–99. Men over 65 years of age were identified from the electoral roll and a randomized sample of 12,203 underwent baseline aortic ultrasound screening. The greatest transverse and antero-posterior diameter of the infra-renal aorta was measured using a Toshiba Capasee ultrasound machine with a 3.75 MHz probe (Toshiba Australia, North Ryde, NSW). The baseline and follow-up epidemiological and clinical measurements have been described previously (4). The 750 individuals examined in this study were a sub-set of the HIMS sample, with the 377 cases having a mean infra-renal aortic diameter of 36mm and the 373 controls of 21mm (5).

**LEeds Aneurysm Development Study (LEADS), Leeds, United Kingdom:** The Leads Aneurysm Development Study recruited both men and women, of Caucasian ethnic origin, aged  $\geq 55$  years. Other uses of this study have been described elsewhere (6, 7). AAA cases were recruited from patients undergoing routine ultrasound surveillance for small AAA (3.0 to 5.4 cm) and patients attending for elective surgical repair of AAA within the Leeds Teaching Hospitals NHS Trust; AAA was defined using ultrasonography as an AAA  $\geq 3$  cm in the maximum anterior-posterior diameter.

Age-matched controls were recruited from a variety of sources comparable with the initial source of referral of the AAA case, including Vascular Surgery and other medical and surgical specialty out-patients departments. Additional controls were recruited through community discussion groups and others self-referred through 'word-of-mouth' from study participants. Controls underwent the same investigation protocol as cases, including abdominal ultrasound to exclude the presence of AAA – those with a normal aortic diameter after age 65 years were assumed to be aneurysm free for life. Exclusion criteria included participants of non-Caucasian ethnic origin, aged  $< 65$  years with uncured malignancy, recent ( $< 3$  months) operation and active inflammatory conditions.

**Danville, Pennsylvania, USA:** AAA patients were enrolled through the Geisinger Clinic Department of Vascular Surgery at Geisinger Medical Center, Danville, PA. Details of this case-control set have been reported previously (8), and the samples have been used in previous association studies (2, 8). AAA cases were defined as infrarenal aortic diameter  $\geq 30$  mm as revealed by abdominal imaging. Approximately 20% of individuals with AAA had a family history of AAA. An unselected control group was obtained through the Geisinger MyCode® Project, a cohort of Geisinger Clinic primary care patients recruited for genomic studies. The MyCode® controls were matched for age distribution and sex to the Geisinger Vascular Clinic AAA cases. Based on electronic medical records, controls had no ICD-9 codes for AAA in their records, but they were not screened by ultrasonography for AAA. Both cases and controls from the Geisinger Clinic were of European descent.

**Belgium and Canada:** These sample-sets, in which all individuals were of European descent, include individuals with AAA who were admitted either for emergency repair of ruptured AAA or for an elective surgery to the University Hospital of Liege (Liege, Belgium) and to Dalhousie University Hospital (Halifax, Canada). AAA was defined as an infrarenal aortic diameter  $\geq 30$  mm. Details of these case-control sets have been reported previously (9, 10). Thirty-five individuals were diagnosed with AAA using ultrasonography and did not undergo surgery either because of old age or because the aneurysm was relatively small. Approximately 40% of individuals with AAA had a family history of AAA. Control samples (51% males) were obtained from spouses of individuals with AAA or from individuals admitted to the same hospitals for reasons other than AAA. Controls had no known AAA, but they were not screened by ultrasonography for AAA.

**The Mayo eMERGE phase II cohort,** consists of 6916 unique patients, the majority ( $>95\%$ ) of whom are of European ancestry. The participants included peripheral arterial disease cases and controls, venous thromboembolism cases and controls, resistant hypertension cases and controls and pancreatic cancer controls. Cases of abdominal aortic aneurysm (AAA) were ascertained as follows. Patients with billing codes for AAA or any procedure codes for open or endovascular AAA repair were first identified. AAA case status was confirmed by presence of distal, infrarenal or juxtarenal abdominal aortic anteroposterior diameter  $\geq 3$  cm, measured with

ultrasound, conventional or angiography of computed tomography or magnetic resonance, or the presence of postoperative change of abdominal aortic aneurysm repair on imaging. AAA controls were defined based on absence of billing or procedure codes for AAA.

- 1 Bown, M.J., Jones, G.T., Harrison, S.C., Wright, B.J., Bumpstead, S., Baas, A.F., Gretarsdottir, S., Badger, S.A., Bradley, D.T., Burnand, K. et al. (2011) Abdominal aortic aneurysm is associated with a variant in low-density lipoprotein receptor-related protein 1. *Am. J. Hum. Genet.*, 89, 619-627.
- 2 Gretarsdottir, S., Baas, A.F., Thorleifsson, G., Holm, H., den Heijer, M., de Vries, J.P., Kranendonk, S.E., Zeebregts, C.J., van Sterkenburg, S.M., Geelkerken, R.H. et al. (2010) Genome-wide association study identifies a sequence variant within the DAB2IP gene conferring susceptibility to abdominal aortic aneurysm. *Nat. Genet.*, 42, 692-697.
- 3 Harrison, S.C., Smith, A.J., Jones, G.T., Swerdlow, D.I., Rampuri, R., Bown, M.J., Folkersen, L., Baas, A.F., de Borst, G.J., Blankensteijn, J.D. et al. (2012) Interleukin-6 receptor pathways in abdominal aortic aneurysm. *Eur. Heart. J.* DOI:10.1093/eurheartj/ehs354
- 4 Norman, P.E., Flicker, L., Almeida, O.P., Hankey, G.J., Hyde, Z. and Jamrozik, K. (2009) Cohort Profile: The Health In Men Study (HIMS). *Int. J. Epidemiol.*, 38, 48-52.
- 5 Jones, G.T., Thompson, A.R., van Bockxmeer, F.M., Hafez, H., Cooper, J.A., Golledge, J., Humphries, S.E., Norman, P.E. and van Rij, A.M. (2008) Angiotensin II type 1 receptor 1166C polymorphism is associated with abdominal aortic aneurysm in three independent cohorts. *Arterioscler. Thromb. Vasc. Biol.*, 28, 764-770.
- 6 Scott, D.J., Prasad, P., Philippou, H., Rashid, S.T., Sohrabi, S., Whalley, D., Kordowicz, A., Tang, Q., West, R.M., Johnson, A. et al. (2011) Clot architecture is altered in abdominal aortic aneurysms and correlates with aneurysm size. *Arterioscler. Thromb. Vasc. Biol.*, 31, 3004-3010.
- 7 Parry, D.J., Al-Barjas, H.S., Chappell, L., Rashid, S.T., Ariens, R.A. and Scott, D.J. (2010) Markers of inflammation in men with small abdominal aortic aneurysm. *J. Vasc. Surg.*, 52, 145-151.
- 8 Elmore, J.R., Obmann, M.A., Kuivaniemi, H., Tromp, G., Gerhard, G.S., Franklin, D.P., Boddy, A.M. and Carey, D.J. (2009) Identification of a genetic variant associated with abdominal aortic aneurysms on chromosome 3p12.3 by genome wide association. *J. Vasc. Surg.*, 49, 1525-1531.
- 9 Helgadottir, A., Thorleifsson, G., Magnusson, K.P., Gretarsdottir, S., Steinthorsdottir, V., Manolescu, A., Jones, G.T., Rinkel, G.J., Blankensteijn, J.D., Ronkainen, A. et al. (2008) The same sequence variant on 9p21 associates with myocardial infarction, abdominal aortic aneurysm and intracranial aneurysm. *Nat. Genet.*, 40, 217-224.
- 10 Ogata, T., Shibamura, H., Tromp, G., Sinha, M., Goddard, K.A., Sakalihasan, N., Limet, R., MacKean, G.L., Arthur, C., Sueda, T. et al. (2005) Genetic analysis of polymorphisms in biologically relevant candidate genes in patients with abdominal aortic aneurysms. *J. Vasc. Surg.*, 41, 1036-1042.

**Supplementary Table S1. Demographic and clinical features of the New Zealand AAA cases control populations.**

|                                   | GWAS Discovery Cohort |                | NZ Validation Cohort |               | Discovery P-value | Validation P-value | Combined P-value |
|-----------------------------------|-----------------------|----------------|----------------------|---------------|-------------------|--------------------|------------------|
|                                   | Controls n=608        | AAA n=612      | Controls n=1812      | AAA n=713     |                   |                    |                  |
| Age (years)                       | 67.6 ± 6.6            | 74.1 ± 7.7     | 68.0 ± 10.0          | 74.1 ± 8.2    | <0.0001           | <0.0001            | <0.0001          |
| Sex (% male)                      | 74.1                  | 77.4           | 62.2                 | 81.2          | 0.18              | <0.0001            | <0.0001          |
| Infrarenal aortic diameter (mm)   | 19.8 ± 2.2            | 58.4 ± 16.1    | 19.2 ± 3.5           | 54.8 ± 17.4   | <0.0001           | <0.0001            | <0.0001          |
| Body Mass Index                   | 26.0 ± 3.6            | 25.4 ± 6.8     | 27.5 ± 4.8           | 26.6 ± 5.7    | 0.12              | 0.0004             | 0.0001           |
| Hypertension (%)                  | 27.4                  | 56.9           | 50.8                 | 58.6          | <0.0001           | 0.0002             | <0.0001          |
| Dyslipidemia (%)                  | 27.9                  | 48.9           | 47.1                 | 51.9          | <0.0001           | 0.02               | <0.0001          |
| HDL-cholesterol (mmol/L)          | 1.41 ± 0.48           | 1.15 ± 0.38    | 1.28 ± 0.53          | 1.15 ± 0.38   | <0.0001           | <0.0001            | <0.0001          |
| hs-CRP, (mg/L), median (IQR)      | 1.4 (0.7-2.7)         | 4.3 (1.9-10.3) | 2.9 (1.3-6.3)        | 3.7 (1.8-7.5) | <0.0001           | <0.0001            | <0.0001          |
| Diabetes (%)                      | 3.6                   | 11.5           | 16.2                 | 9.9           | <0.0001           | <0.0001            | 0.04             |
| Smoking (% mild, moderate, heavy) | 19, 15, 13            | 12, 22, 49     | 14, 19, 33           | 12, 23, 48    | <0.0001           | <0.0001            | <0.0001          |
|                                   |                       |                |                      |               |                   |                    |                  |
| Coronary artery disease (%)*      | 0                     | 37.3           | 39.4                 | 42.6          | <0.0001           | 0.12               | <0.0001          |
| Peripheral vascular disease (%)   | 0                     | 17.8           | 39.1                 | 18.7          |                   | <0.0001            | <0.0001          |
| Any arterial disease              | 0                     | 48.4           | 69.7                 | 52.4          | <0.0001           | <0.0001            | 0.68             |
| Venous disease (%)                | 30.7                  | 26.8           | 28.6                 | 31.7          | 0.13              | 0.10               | 0.48             |

\*While both control groups were free of AAA, the discovery cohort controls were also free of a history of arterial disease in contrast to the validation controls for whom over two thirds had a history of symptomatic arterial disease.

**Supplementary Table S2. Genotyping of dyslipidemia and CAD genetic markers in the NZ AAA GWAS discovery population**

| Chr           | Gene locus        | Lead SNP   | Trait<br>(Secondary trait) | Position<br>(build 37.3) | Allele | Control<br>MAF | Case<br>MAF | AAA<br>OR   | AAA 95% CI  | AAA<br>p-values      |
|---------------|-------------------|------------|----------------------------|--------------------------|--------|----------------|-------------|-------------|-------------|----------------------|
| 1             | <i>PCSK9</i>      | rs11206510 | CAD                        | 55496039                 | C      | 0.19           | 0.20        | 1.08        | 0.88 - 1.33 | 0.47                 |
|               |                   | rs2479409  | LDL (TC)                   | 55504650                 | G      | 0.38           | 0.36        | 0.95        | 0.81 - 1.12 | 0.56                 |
|               |                   | rs2479394  | AAA                        | 55486064                 | C      | 0.32           | 0.25        | 0.70        | 0.59 - 0.84 | $8.4 \times 10^{-5}$ |
|               | <i>PPAB2B</i>     | rs17114036 | CAD                        | 56962821                 | G      | 0.10           | 0.08        | 0.79        | 0.59 - 1.07 | 0.13                 |
|               |                   | rs1261411  | AAA                        | 57017739                 | T      | 0.43           | 0.38        | 0.80        | 0.68 - 0.95 | $8.2 \times 10^{-3}$ |
|               | <i>ANGPTL3</i>    | rs2131925  | TG (TC, LDL)               | 63025942                 | G      | 0.34           | 0.35        | 1.04        | 0.88 - 1.23 | 0.63                 |
|               | <i>SORT1</i>      | rs599839   | CAD AAA                    | 109822166                | G      | 0.25           | 0.17        | 0.66        | 0.54 - 0.80 | $2.5 \times 10^{-5}$ |
|               |                   | rs629301   | LDL (TC, HDL)              | 109818306                | G      | 0.24           | 0.19        | 0.73        | 0.60 - 0.89 | $1.8 \times 10^{-3}$ |
|               |                   | rs12740374 | *                          | 109817590                | T      | 0.24           | 0.18        | 0.70        | 0.58 - 0.86 | $4.3 \times 10^{-4}$ |
|               | <i>MOSC1</i>      | rs2642442  | TC (LDL)                   | 220973563                | C      | 0.32           | 0.31        | 0.96        | 0.81 - 1.15 | 0.68                 |
|               |                   | rs17649913 | AAA                        | 220983402                | G      | 0.23           | 0.17        | 0.72        | 0.59 - 0.88 | $1.2 \times 10^{-3}$ |
|               | <i>MIA3</i>       | rs17465637 | CAD                        | 222823529                | A      | 0.30           | 0.27        | 0.85        | 0.71 - 1.03 | 0.08                 |
| <i>GALNT2</i> | rs4846914         | HDL (TG)   | 230295691                  | G                        | 0.38   | 0.40           | 1.07        | 0.91 - 1.26 | 0.41        |                      |
| 2             | <i>APOB</i>       | rs1367117  | LDL (TC)                   | 21263900                 | A      | 0.34           | 0.34        | 1.01        | 0.84 - 1.23 | 0.89                 |
|               |                   | rs1042034  | TG (HDL)                   | 21225281                 | C      | 0.21           | 0.22        | 1.03        | 0.85 - 1.25 | 0.76                 |
|               | <i>GCKR</i>       | rs1260326  | TG (TC)                    | 27730940                 | T      | 0.38           | 0.36        | 0.91        | 0.77 - 1.08 | 0.28                 |
|               | <i>ABCG5/8</i>    | rs4299376  | LDL (TC)                   | 44072576                 | G      | 0.30           | 0.34        | 1.22        | 1.02 - 1.45 | 0.03                 |
|               | <i>WDR12</i>      | rs6725887  | CAD                        | 203454130                | C      | 0.13           | 0.14        | 0.93        | 0.73 - 1.17 | 0.52                 |
|               | <i>IRS1</i>       | rs2972146  | HDL (TG)                   | 227100698                | G      | 0.33           | 0.31        | 0.92        | 0.78 - 1.10 | 0.39                 |
|               |                   | rs10933136 | AAA                        | 227184088                | C      | 0.19           | 0.26        | 1.44        | 1.19 - 1.74 | $1.9 \times 10^{-4}$ |
| 3             | <i>MRAS</i>       | rs2306374  | CAD                        | 138119952                | C      | 0.15           | 0.16        | 1.07        | 0.86 - 1.34 | 0.53                 |
| 5             | <i>HMGCR</i>      | rs12916    | TC (LDL)                   | 74656539                 | A      | 0.39           | 0.41        | 1.09        | 0.93 - 1.28 | 0.31                 |
|               | <i>TIMD4</i>      | rs6882076  | TC (LDL, TG)               | 156390297                | T      | 0.38           | 0.37        | 0.94        | 0.79 - 1.10 | 0.42                 |
| 6             | <i>PHACTR1</i>    | rs12526453 | CAD                        | 12927544                 | G      | 0.33           | 0.33        | 1.01        | 0.85 - 1.19 | 0.94                 |
|               | <i>ANKS1A</i>     | rs17609940 | CAD                        | 35034800                 | C      | 0.22           | 0.22        | 1.00        | 0.82 - 1.22 | 0.82                 |
|               |                   | rs9370138  | AAA                        | 52532308                 | T      | 0.23           | 0.17        | 0.69        | 0.56-0.84   | $2.6 \times 10^{-4}$ |
| 7             | <i>MLXIPL</i>     | rs17145738 | TG (HDL)                   | 72982874                 | T      | 0.13           | 0.13        | 1.03        | 0.81 - 1.31 | 0.81                 |
|               | <i>ZC3HC1</i>     | rs11556924 | CAD                        | 129450732                | T      | 0.41           | 0.36        | 0.83        | 0.70 - 0.98 | 0.99                 |
| 8             | <i>PP1R3B</i>     | rs9987289  | HDL (TC, LDL)              | 9183358                  | A      | 0.07           | 0.08        | 1.22        | 0.90 - 1.65 | 0.19                 |
|               | <i>LPL</i>        | rs12678919 | TG (HDL)                   | 19844222                 | G      | 0.11           | 0.09        | 0.78        | 0.59 - 1.02 | 0.07                 |
|               | <i>TR1B1</i>      | rs2954029  | TG (TC, LDL, HDL)          | 126490972                | T      | 0.45           | 0.46        | 1.03        | 0.87 - 1.21 | 0.72                 |
| 9             | <i>CDKN2B-AS1</i> | rs4977574  | CAD                        | 22098574                 | A      | 0.51           | 0.46        | 0.80        | 0.68 - 0.95 | 0.01                 |
|               | <i>ABO</i>        | rs579459   | CAD                        | 136154168                | C      | 0.19           | 0.20        | 1.03        | 0.85 - 1.26 | 0.75                 |
|               |                   | rs35536860 | AAA                        | 136143120                | G      | 0.25           | 0.19        | 0.73        | 0.58 - 0.92 | $6.1 \times 10^{-3}$ |
| 10            | <i>CXCL12</i>     | rs1746048  | CAD                        | 44775824                 | T      | 0.13           | 0.14        | 1.10        | 0.87 - 1.39 | 0.44                 |

|    |                  |            |                        |           |   |      |      |      |             |                        |
|----|------------------|------------|------------------------|-----------|---|------|------|------|-------------|------------------------|
|    | <i>CYP17A1</i>   | rs12413409 | CAD                    | 104719096 | A | 0.08 | 0.07 | 0.88 | 0.65 - 1.18 | 0.39                   |
| 11 | <i>FADS1-2-3</i> | rs174546   | TG (TC, LDL, HDL)      | 61569830  | T | 0.37 | 0.36 | 0.94 | 0.79 - 1.11 | 0.44                   |
|    | <i>APOA1</i>     | rs964184   | CAD, TG (TC, LDL, HDL) | 116648917 | G | 0.14 | 0.15 | 1.12 | 0.89 - 1.41 | 0.33                   |
| 12 | <i>SH2B3</i>     | rs3184504  | CAD                    | 111884608 | T | 0.47 | 0.51 | 1.18 | 0.64 - 0.96 | 0.07                   |
|    | <i>HNF1A</i>     | rs1169288  | TC (LDL)               | 121416650 | C | 0.30 | 0.32 | 1.10 | 0.91 - 1.32 | 0.32                   |
| 13 | <i>COL4A1</i>    | rs4773144  | CAD                    | 110960712 | G | 0.44 | 0.44 | 0.97 | 0.83 - 1.14 | 0.72                   |
| 15 | <i>LIPC</i>      | rs1532085  | HDL (TC, TG)           | 58683366  | A | 0.40 | 0.39 | 0.96 | 0.81 - 1.13 | 0.62                   |
|    |                  | rs4775049  | AAA                    | 58748906  | G | 0.46 | 0.40 | 0.79 | 0.67 - 0.92 | 3.4 x 10 <sup>-3</sup> |
|    | <i>ADAMTS7</i>   | rs3825807  | CAD                    | 79089111  | G | 0.43 | 0.44 | 1.07 | 0.90 - 1.25 | 0.45                   |
|    |                  | rs1564499  | AAA                    | 79084808  | A | 0.27 | 0.23 | 0.81 | 0.68 - 0.98 | 0.03                   |
| 16 | <i>CETP</i>      | rs3764261  | HDL (TC, LDL, TG)      | 56993324  | T | 0.34 | 0.32 | 0.92 | 0.77 - 1.09 | 0.33                   |
|    | <i>LCAT</i>      | rs16942887 | HDL                    | 67928042  | A | 0.09 | 0.10 | 1.22 | 0.93 - 1.60 | 0.16                   |
|    | <i>HPR</i>       | rs2000999  | TC (LDL)               | 72108093  | G | 0.20 | 0.19 | 0.94 | 0.77 - 1.16 | 0.57                   |
| 17 | <i>SMG6</i>      | rs216172   | CAD                    | 2126504   | C | 0.34 | 0.33 | 0.94 | 0.80 - 1.12 | 0.50                   |
|    | <i>RASD1</i>     | rs12936587 | CAD                    | 17543722  | A | 0.48 | 0.45 | 0.91 | 0.78 - 1.07 | 0.26                   |
|    | <i>UBE2Z</i>     | rs46522    | CAD                    | 46988597  | C | 0.51 | 0.48 | 0.87 | 0.74 - 1.02 | 0.09                   |
| 18 | <i>LIPG</i>      | rs7241918  | HDL (TC)               | 47160953  | G | 0.18 | 0.19 | 1.08 | 0.88 - 1.33 | 0.46                   |
| 19 | <i>LDLR</i>      | rs1122608  | CAD LDL                | 11163601  | T | 0.25 | 0.22 | 0.85 | 0.70 - 1.02 | 0.08                   |
|    |                  | rs3786728  | AAA                    | 11168029  | C | 0.25 | 0.22 | 0.82 | 0.67 - 0.99 | 0.04                   |
|    | <i>APOE</i>      | rs4420638  | LDL (TC, TG)           | 45422946  | G | 0.17 | 0.21 | 1.29 | 1.06 - 1.59 | 0.01                   |
| 20 | <i>PLTP</i>      | rs6073966  | HDL, TG                | 44570192  | T | 0.19 | 0.15 | 0.78 | 0.63 - 0.97 | 0.03                   |
| 21 | <i>MRPS6</i>     | rs9982601  | CAD                    | 35599128  | T | 0.12 | 0.12 | 0.96 | 0.75 - 1.22 | 0.73                   |

**Table S2. Genotyping of dyslipidemia and CAD genetic markers in the NZ AAA GWAS discovery population.** The leading SNPs in each candidate locus are listed. The associated phenotypes for each SNP are coronary artery disease (CAD), total cholesterol (TC), low-density lipoprotein cholesterol (LDL), high-density lipoprotein cholesterol (HDL) and triglycerides (TG). In addition, the leading aneurysm (AAA) SNP ( $p < 0.05$ ) in these loci is also shown. The discovery Affymetrix SNP6.0 dataset was filtered to exclude low SNP and individual call rate ( $< 0.98$ ). Imputation was performed using the 1000 Genome June 2011, and then imputation quality filtered ( $> 0.9$ ). \*Probable SORT1 functional SNP (1).

1. Musunuru, K., Strong, A., Frank-Kamenetsky, M., Lee, N.E., Ahfeldt, T., Sachs, K.V., Li, X., Li, H., Kuperwasser, N., Ruda, V.M. *et al.* (2010) From noncoding variant to phenotype via SORT1 at the 1p13 cholesterol locus. *Nature*, **466**, 714-719.

**Supplementary Table S3. Validation genotyping of putative genetic markers in NZ AAA populations.**

| Locus/leading SNP                   | Group                   | Allele                              | Allele Odds Ratio (95%CI)   | p-value                     | HWE                  |
|-------------------------------------|-------------------------|-------------------------------------|-----------------------------|-----------------------------|----------------------|
| <i>PCSK9</i> ; 1p32, rs2479394      |                         | T>C                                 | C                           |                             |                      |
| NZ discovery                        | Case<br>Control         | 297 (0.258)<br>378 (0.326)          | 0.72<br>(0.60-0.86)         | 2.9 x10 <sup>-4</sup>       | 0.06<br>0.75         |
| NZ validation                       | Case<br>Control         | 403 (0.288)<br>1056 (0.295)         | 0.97<br>(0.84-1.11)         | 0.63                        | 0.58<br>0.16         |
| <i>PPAP2B</i> ; 1p22, rs1261411     |                         | A>G                                 | G                           |                             |                      |
| NZ discovery                        | Case<br>Control         | 455 (0.397)<br>474 (0.419)          | 0.91<br>(0.77-1.07)         | 0.28                        | 0.002<br>0.66        |
| NZ validation                       | Case<br>Control         | 567 (0.411)<br>1408 (0.402)         | 1.04<br>(0.92-1.18)         | 0.56                        | 0.10<br>0.08         |
| <i>SORT1</i> ; 1p13.3, rs599839     |                         | A>G                                 | G                           |                             |                      |
| <b>NZ (GWAS) discovery</b>          | <b>Case<br/>Control</b> | <b>219 (0.180)<br/>305 (0.249)</b>  | <b>0.66<br/>(0.54-0.81)</b> | <b>3.3 x10<sup>-5</sup></b> | <b>0.40<br/>0.81</b> |
| <b>NZ validation</b>                | <b>Case<br/>Control</b> | <b>272 (0.191)<br/>848 (0.240)</b>  | <b>0.75<br/>(0.64-0.88)</b> | <b>2.4 x10<sup>-4</sup></b> | <b>0.49<br/>0.97</b> |
| <i>MOSC1</i> ; 1q41, rs17649913     |                         | A>G                                 | G                           |                             |                      |
| NZ discovery                        | Case<br>Control         | 198 (0.169)<br>256 (0.221)          | 0.71<br>(0.58-0.88)         | 1.4 x10 <sup>-3</sup>       | 0.83<br>0.93         |
| NZ validation                       | Case<br>Control         | 330 (0.236)<br>580 (0.207)          | 1.19<br>(1.01-1.38)         | 0.03                        | 0.21<br>0.07         |
| <i>ABCG5/8</i> ; 2p21, rs4245791    |                         | T>C                                 | C                           |                             |                      |
| NZ discovery                        | Case<br>Control         | 408 (0.348)<br>333 (0.301)          | 1.24<br>(1.04-1.48)         | 0.015                       | 0.046<br>0.42        |
| NZ validation                       | Case<br>Control         | 490 (0.343)<br>1184 (0.329)         | 1.06<br>(0.94-1.22)         | 0.32                        | 0.61<br>0.71         |
| <i>IRS1</i> ; 2q36, rs10933136      |                         | G>C                                 | C                           |                             |                      |
| NZ discovery                        | Case<br>Control         | 303 (0.259)<br>225 (0.193)          | 1.46<br>(1.20-1.78)         | 1.4 x10 <sup>-4</sup>       | 0.64<br>0.25         |
| NZ validation                       | Case<br>Control         | 312 (0.219)<br>734 (0.206)          | 1.08<br>(0.93-1.26)         | 0.30                        | 0.86<br>0.17         |
| <i>ZC3HC1</i> ; 7q32, rs11556924    |                         |                                     |                             |                             |                      |
| NZ discovery                        | Case<br>Control         | 398 (0.357)<br>449 (0.405)          | 0.81<br>(0.69-0.97)         | 0.02                        | 0.04<br>0.26         |
| NZ validation                       | Case<br>Control         | 603 (0.397)<br>518 (0.384)          | 1.06<br>(0.91-1.23)         | 0.48                        | 0.73<br>0.46         |
| <i>CDKN2B-AS1</i> ; 9p21, rs4977574 |                         | A>G                                 | G                           |                             |                      |
| <b>NZ discovery</b>                 | <b>Case<br/>Control</b> | <b>518 (0.446)<br/>594 (0.489)</b>  | <b>0.77<br/>(0.65-0.91)</b> | <b>1.6 x10<sup>-3</sup></b> | <b>0.68<br/>0.04</b> |
| <b>NZ validation</b>                | <b>Case<br/>Control</b> | <b>636 (0.450)<br/>1723 (0.479)</b> | <b>0.89<br/>(0.79-1.01)</b> | <b>0.067</b>                | <b>0.09<br/>0.94</b> |
| <i>ABO</i> ; 9q34, rs612169         |                         | A>G                                 | G                           |                             |                      |
| NZ discovery                        | Case<br>Control         | 331 (0.281)<br>373 (0.325)          | 0.81<br>(0.68-0.96)         | 0.022                       | 0.77<br>0.65         |
| NZ validation                       | Case<br>Control         | 447 (0.318)<br>1148 (0.323)         | 0.98<br>(0.86-1.12)         | 0.77                        | 0.40<br>0.15         |
| <i>SH2B3</i> ; 12q24, rs28362508    |                         |                                     |                             |                             |                      |
| NZ discovery                        | Case<br>Control         | 215 (0.193)<br>260 (0.233)          | 0.78<br>(0.64-0.96)         | 0.02                        | 0.15<br>0.94         |
| NZ validation                       | Case                    | 270 (0.190)                         | 0.93                        | 0.40                        | 0.38                 |



|                                      |                |                     |                    |                             |             |
|--------------------------------------|----------------|---------------------|--------------------|-----------------------------|-------------|
|                                      | Control        | 576 (0.201)         | (0.80-1.10)        |                             | 0.90        |
| <b><i>LIPC</i>; 15q21, rs4775049</b> |                | <b>G&gt;T</b>       | <b>T</b>           |                             |             |
| <b>NZ discovery</b>                  | <b>Case</b>    | <b>459 (0.405)</b>  | <b>0.80</b>        | <b>8.7 x10<sup>-3</sup></b> | <b>0.08</b> |
|                                      | <b>Control</b> | <b>512 (0.460)</b>  | <b>(0.68-0.95)</b> |                             | <b>0.95</b> |
| <b>NZ validation</b>                 | <b>Case</b>    | <b>611 (0.443)</b>  | <b>0.90</b>        | <b>0.10</b>                 | <b>0.91</b> |
|                                      | <b>Control</b> | <b>1599 (0.469)</b> | <b>(0.79-1.02)</b> |                             | <b>0.13</b> |
| <i>ADAMTS7</i> ; 15q24, rs1564499    |                | G>A                 | A                  |                             |             |
| NZ discovery                         | Case           | 268 (0.232)         | 0.76               | 4.9 x10 <sup>-3</sup>       | 0.65        |
|                                      | Control        | 325 (0.283)         | (0.63-0.92)        |                             | 0.15        |
| NZ validation                        | Case           | 355 (0.249)         | 0.97               | 0.65                        | 0.67        |
|                                      | Control        | 907 (0.255)         | (0.84-1.12)        |                             | 0.66        |
| <i>LDLR</i> ; 19p13, rs3786727       |                | C>T                 | T                  |                             |             |
| NZ discovery                         | Case           | 317 (0.296)         | 0.99               | 0.90                        | 0.70        |
|                                      | Control        | 322 (0.298)         | (0.82-1.19)        |                             | 0.68        |
| NZ validation                        | Case           | 431 (0.311)         | 1.06               | 0.44                        | 0.99        |
|                                      | Control        | 875 (0.299)         | (0.92-1.21)        |                             | 0.05        |
| <i>APOE</i> ; 19q13, rs4420638       |                | A>G                 | G                  |                             |             |
| NZ discovery                         | Case           | 248 (0.216)         | 1.28               | 0.021                       | 0.24        |
|                                      | Control        | 198 (0.177)         | (1.04-1.58)        |                             | 0.90        |
| NZ validation                        | Case           | 291 (0.211)         | 1.11               | 0.16                        | 0.02        |
|                                      | Control        | 676 (0.193)         | (0.95-1.30)        |                             | 0.04        |
| <i>PLTP</i> ; 20q13, rs6073966       |                | C>T                 |                    |                             |             |
| NZ discovery                         | Case           | 177 (0.157)         | 0.74               | 0.006                       | 0.54        |
|                                      | Control        | 223 (0.202)         | (0.59-0.92)        |                             | 0.51        |
| NZ validation                        | Case           | 236 (0.168)         | 1.02               | 0.98                        | 0.74        |
|                                      | Control        | 466 (0.165)         | (0.86-1.21)        |                             | 0.39        |

Putative SNPs from the *in silico* screen of the NZ AAA discovery cohort were re-genotyped in both the discovery and validation cohorts using allele specific Taqman probes. Three loci, 1p13.3 *SORT1*, 9p21 *CDKN2BAS1* and 15q21 *LIPC* appeared to show suggestive replicated association.

**Supplementary Figure 1. Relative expression of 1p13 genes (standardized to GAPDH) in aortic aneurysm tissue.**

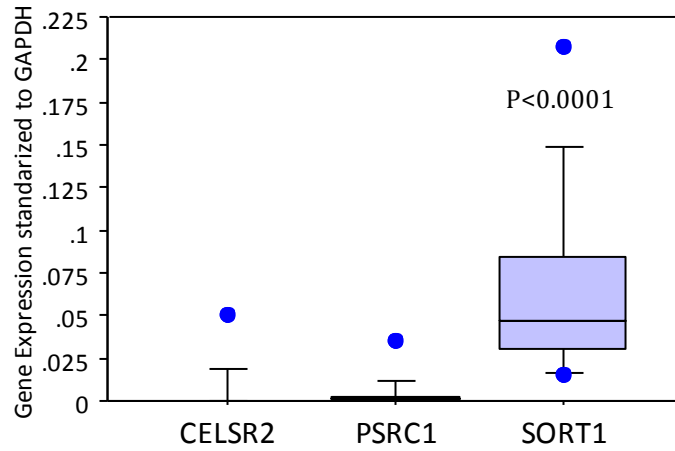

*SORT1* gene expression was observed in all 11 aortic aneurysm specimens examined. Box and whiskers plots, showing median, 25<sup>th</sup> and 75<sup>th</sup> percentile (box) and 10<sup>th</sup> and 90<sup>th</sup> percentile (bars).

**Supplementary Figure 2. Sortilin-1 abdominal aortic wall protein expression.**

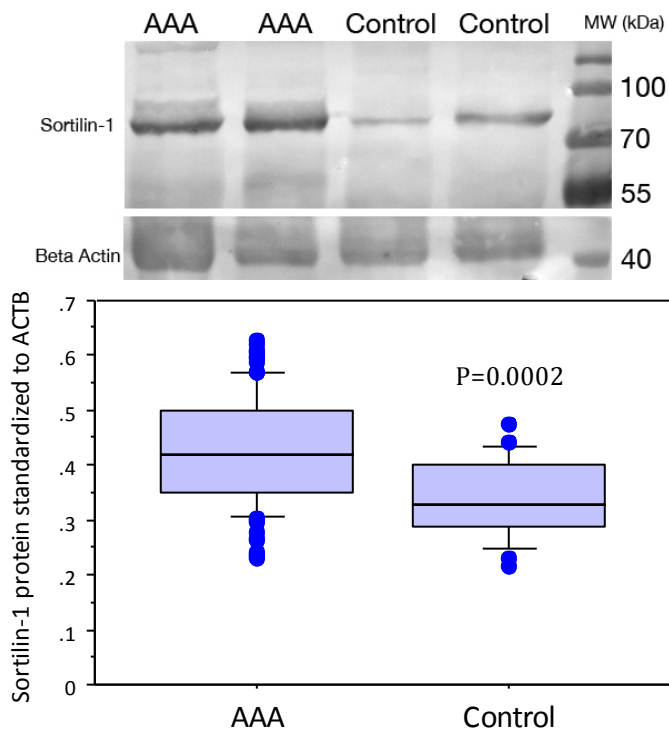

Western blot quantification of sortilin-1 (cytoplasmic domain) in control (n=20) and AAA (n=98) tissue (predicted molecular weight 92 kDa), standardized against ACTB (predicted molecular weight 42 kDa). Box and whiskers plots, showing median, 25th and 75<sup>th</sup> percentile (box) and 10<sup>th</sup> and 90<sup>th</sup> percentile (bars).

**Supplementary Figure 3. Immunohistochemistry for Sortilin-1. Non-aneurysmal infrarenal aorta (male, 32 years).**

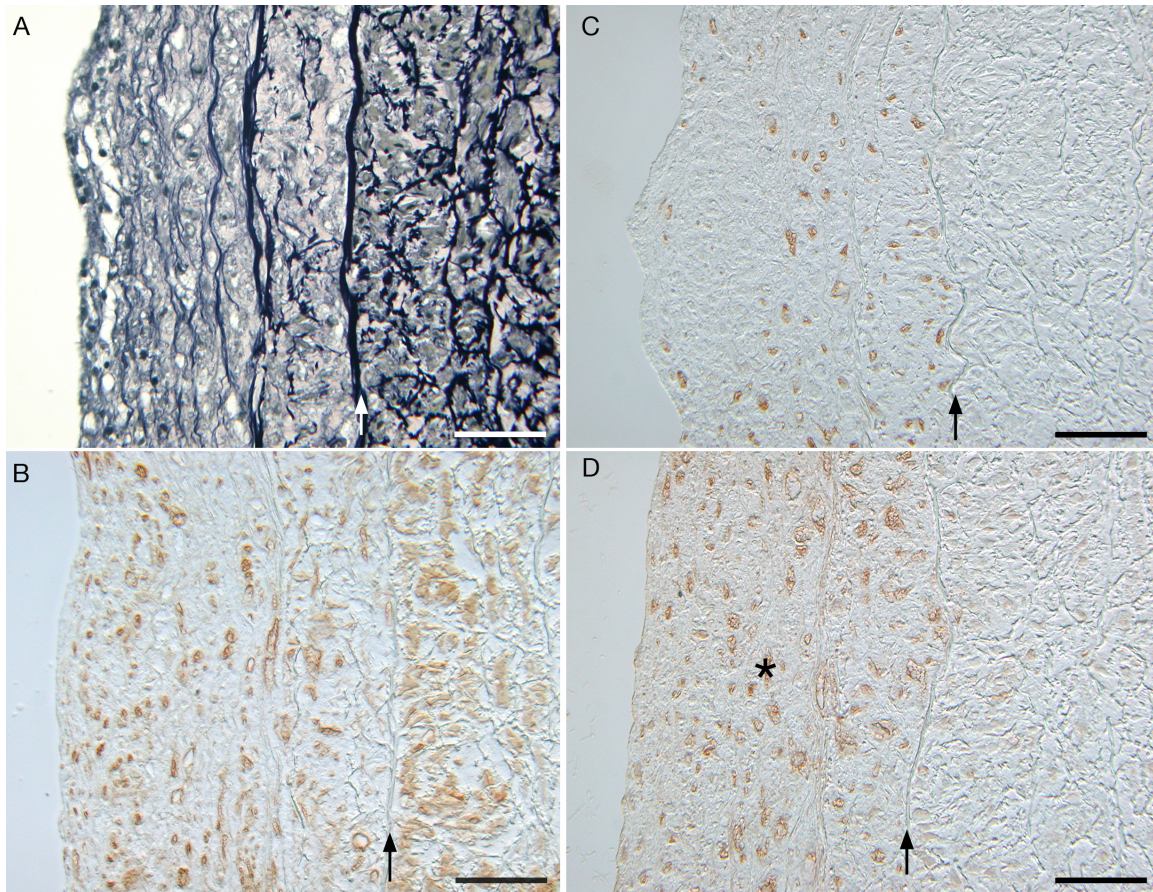

(A) Verhoeff's elastic stain and van Gieson's counterstain, (B) anti-smooth muscle alpha actin, (C) anti-T-cell, (D) anti-sortilin-1 (cytoplasmic domain) immunostaining (brown) with differential interference contrast microscopy. The luminal aortic surface is to the left hand side and the internal elastic lamina (IEL), indicating the intimal medial border, is indicated by an arrow in each panel. (B) Smooth muscle cells (SMCs) and (C) T-cells within the thickened intima were immuno-positive for sortilin-1 (asterisk in D), while the medial SMCs (to the right of the IEL) were very weakly stained, near the intimal medial border or negative (deep media). Regions of intimal thickening without a significant T-cell accumulation were weakly stained for sortilin-1. Negative (no primary antibody) controls were free of background staining. Scale bars equal 50  $\mu$ m.

**Supplementary Figure 4. Immunohistochemistry for Sortilin-1. Anterior aortic wall from a large (11.2cm) abdominal aortic aneurysm (male, 78 years).**

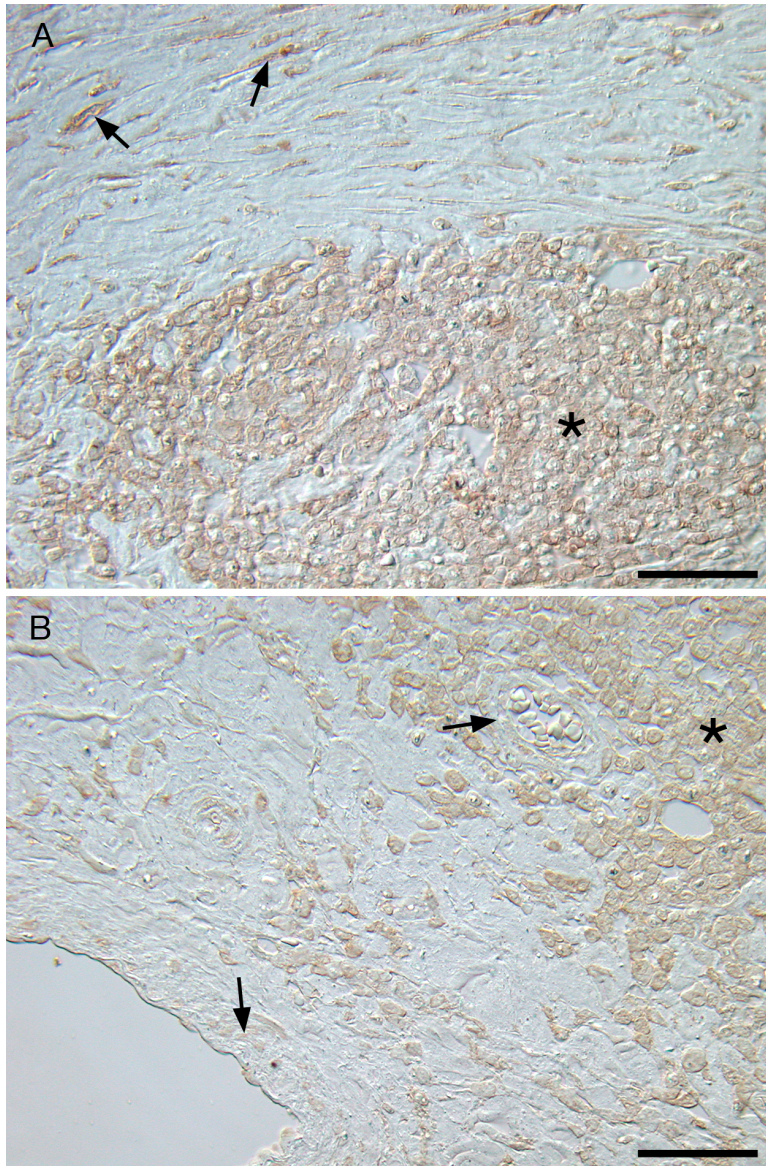

(A) Residual atrophic medial SMCs (arrows) and (T-cell positive) lymphoid aggregates (asterisks) were positively stained for sortilin-1. (B) SMCs surrounding adventitial vasa vasorum (arrows) were only weakly stained compared to intimal or atrophic medial SMCs, suggesting that SMC sortilin-1 expression may be associated with transformed (synthetic) rather than contractile muscle cells. Anti-sortilin-1 (cytoplasmic domain) immunostaining (brown) with differential interference contrast microscopy. Scale bars equal 50  $\mu$ m.
